# Supplementary material for: Nanostructured Electrospun Polycaprolactone—Propolis Mats Composed of Different Morphologies for Potential Use in Wound Healing
Source: MDPI journal article supplement (doi:10.3390/molecules27165351), 2022-08-22
Supplement: s1 [file s1]

# Nanostructured Electrospun Polycaprolactone—Propolis Mats Composed of Different Morphologies for Potential Use in Wound Healing

Agnes Chacor de Figueiredo <sup>1</sup>, Javier Mauricio Anaya Mancipe <sup>1,2</sup>, Aline Oliveira da Silva de Barros <sup>3,4</sup>, Ralph Santos-Oliveira <sup>3,4</sup>, Marcos Lopes Dias <sup>2</sup> and Rossana Mara da Silva Moreira Thiré <sup>1,\*</sup>

<sup>1</sup> COPPE/Program of Metallurgical and Materials Engineering—PEMM, Universidade Federal do Rio de Janeiro, Rio de Janeiro 21941-599, RJ, Brazil

<sup>2</sup> Institute of Macromolecules Professora Eloisa Mano—IMA, Universidade Federal do Rio de Janeiro, Rio de Janeiro 21941-598, RJ, Brazil

<sup>3</sup> Brazilian Nuclear Energy Commission, Nuclear Engineering Institute—IEN, Rio de Janeiro 21941-906, RJ, Brazil

<sup>4</sup> Laboratory of Radiopharmacy and Nanoradiopharmaceuticals, Universidade Estadual da Zona Oeste, Rio de Janeiro 23070-200, RJ, Brazil

\* Correspondence: rossana@metalmat.ufrj.br; Tel.: +55-21-3938-8500

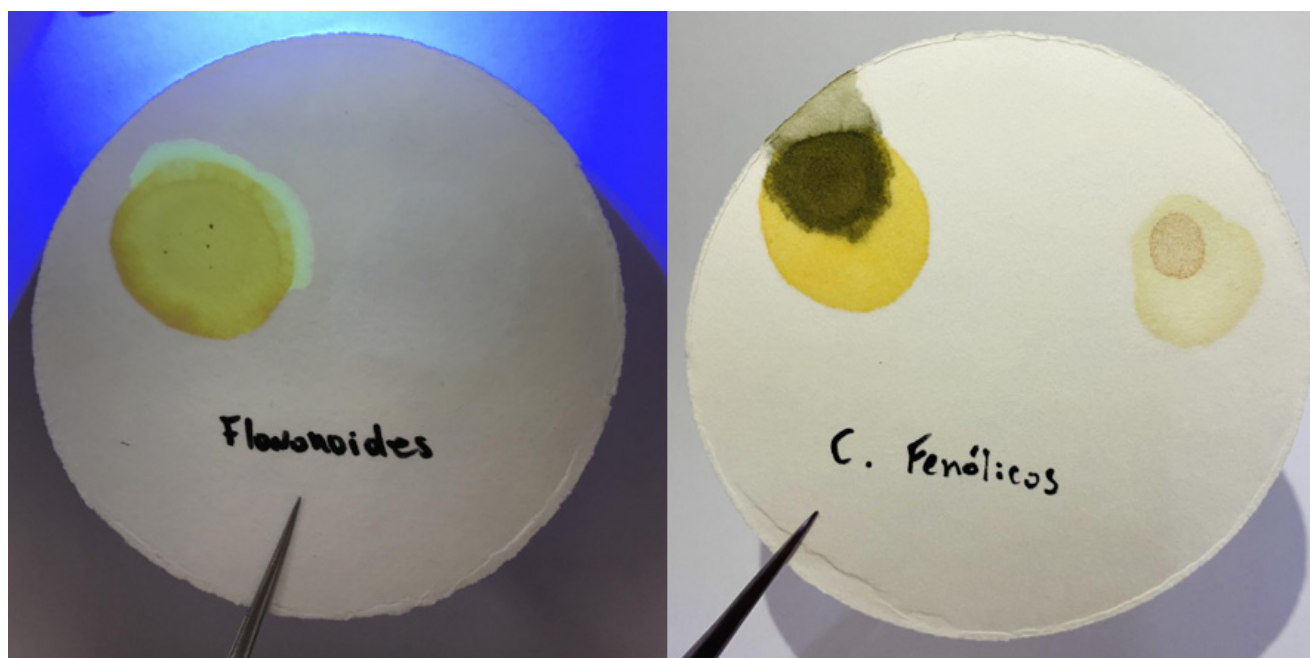

**Figure S1.** Phytochemical qualitative analyses for flavonoids and phenolic compounds in propolis alcoholic extract.

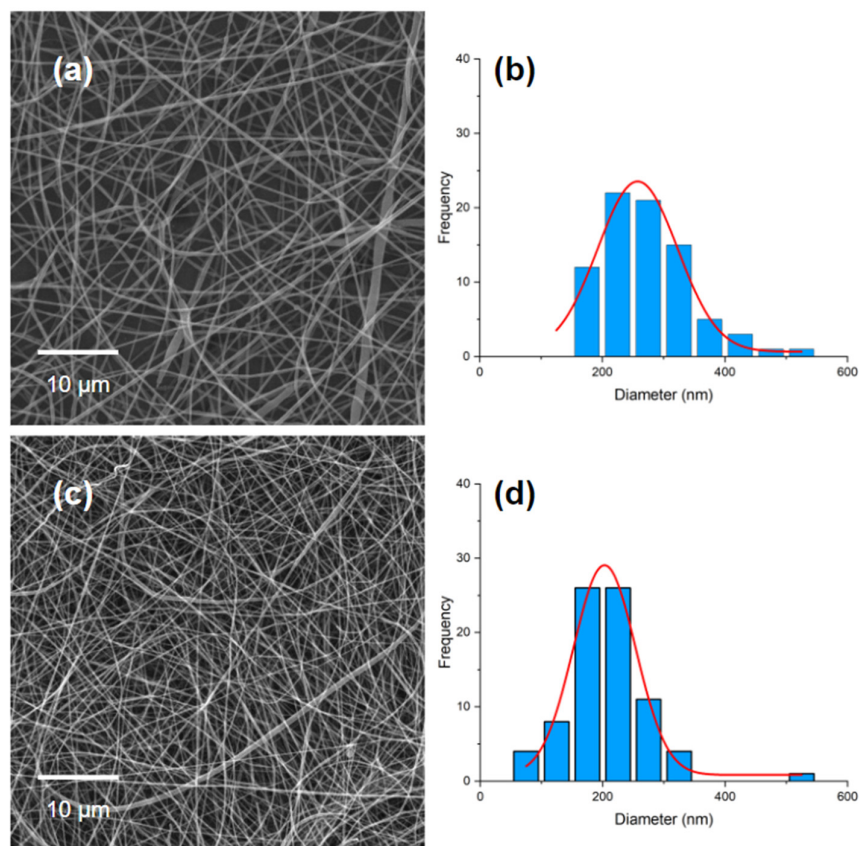

**Figure S2.** Fibre morphology obtained from 0-day storage solution electrospinning. Respectively: (A,C) Higher magnification scanning electron microscopy image for PCL and PCL + Prop electrospun mats; (B,D) Histograms of fibre diameters for PCL and PCL + Prop electrospun mats.

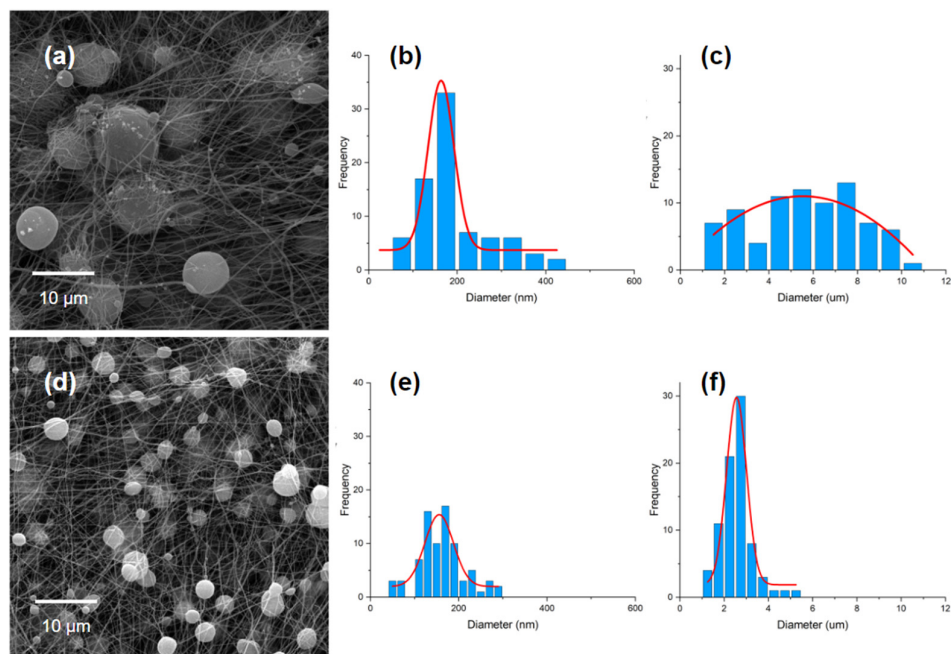

**Figure S3.** Beaded fibre morphology obtained from 7-day storage solution electrospinning. Respectively: (A,D) Higher magnification scanning electron microscopy image for PCL and PCL + Prop electrospun mats; (B,E) Histograms of fibre diameters for PCL and PCL + Prop electrospun mats; (C,F) Histograms of bead diameters for PCL and PCL + Prop electrospun mats.

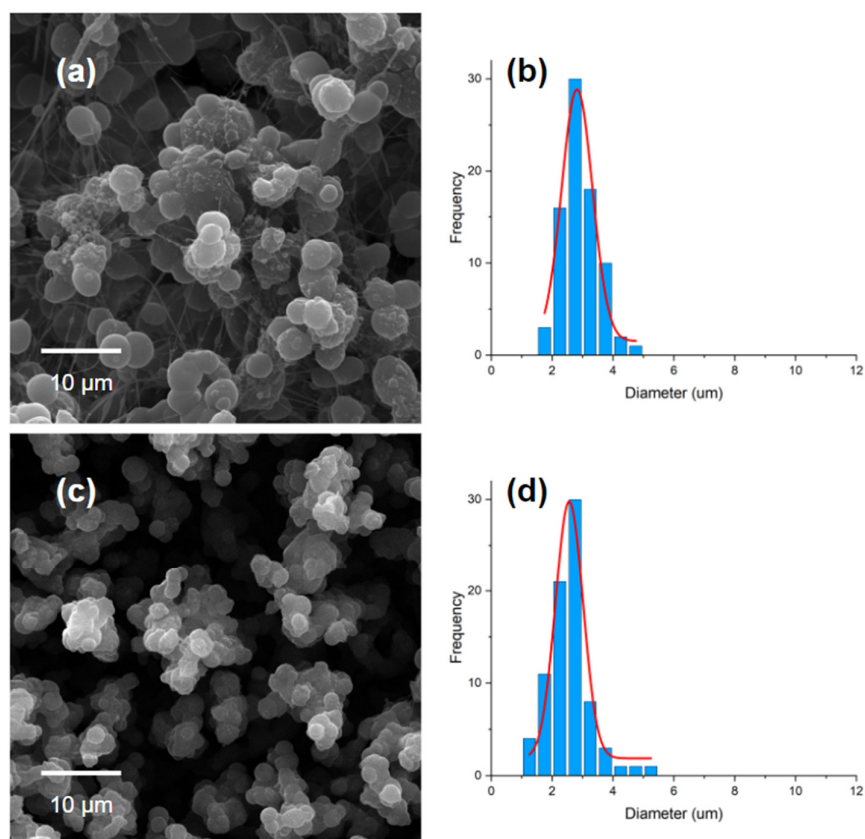

**Figure S4.** Bead morphology obtained from 14-day storage solution electrospinning. Respectively: (A,C) Higher magnification scanning electron microscopy image for PCL and PCL + Prop electrospun mats; (B,D) Histograms of bead diameters for PCL and PCL + Prop electrospun mats.

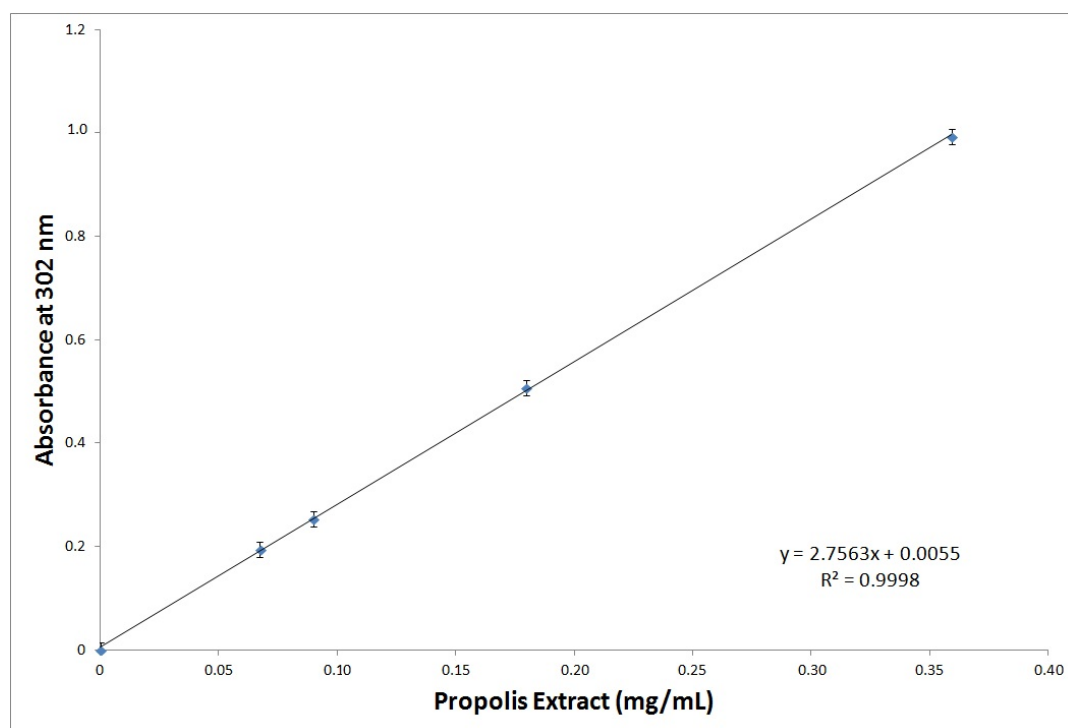

**Figure S5.** Propolis alcoholic extract calibration curve for propolis release assay. Absorbance at 302 nm.

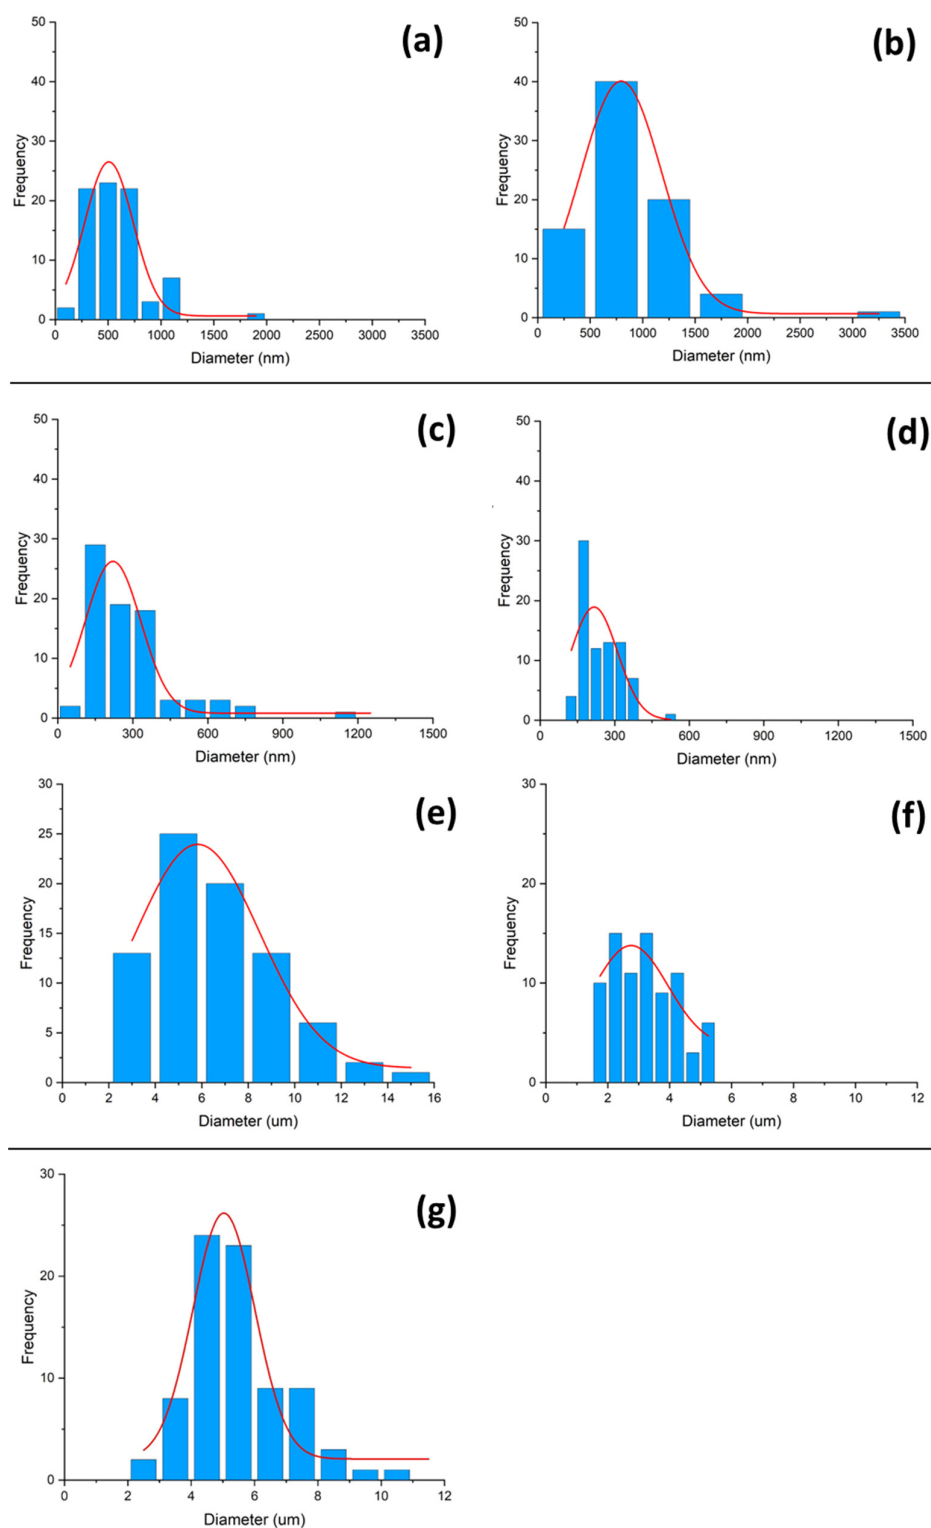

**Figure S6.** Histogram of morphologies by electrospun mats after swelling assay (Figure 9 in manuscript). Fibre Mats: (A) PCL, (B) PCL + Prop. Beaded Fibre mats: (C) Fibres PCL; (D) Fibres PCL + Prop, (E) Beads PCL, (F) Beads PCL + Prop, and Bead Mats (G) PCL.
